# Supplementary material for: Unexplored Potential: Metabolite Screening of Local Lake Algae Isolated from Al-Asfar Lake in Saudi Arabia
Source: MDPI journal article supplement (doi:10.3390/w15152757), 2023-07-30
Supplement: s1 [file s1]

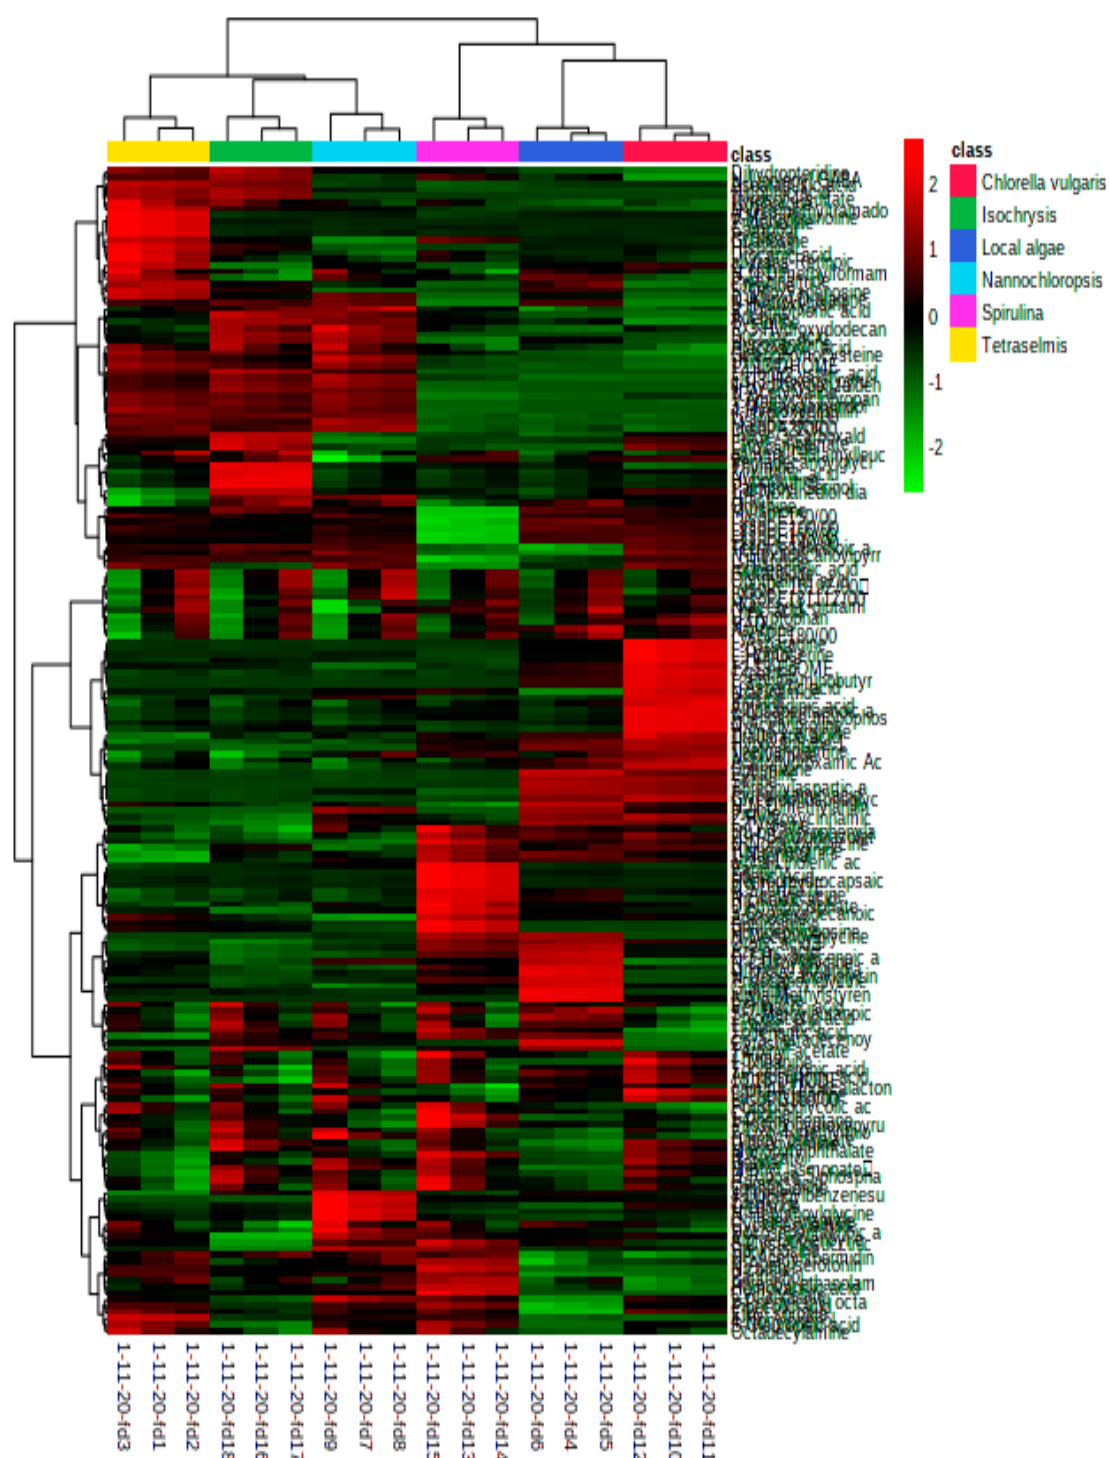

**Figure S1.** The results of the hierarchical clustering analysis are presented as a heatmap, employing the Euclidean distance metric and Ward's linkage method for the clustering algorithm. The heatmap illustrates the relationships and patterns among different metabolites extracted from six algae species (*Tetraselmis*, local algae, *Nannochloropsis*, *Chlorella vulgaris*, *Spirulina*, and *Isochrysis*).
